# Supplementary material for: Acetylcholinesterase (AChE)-mediated immobilization of silver nanoparticles for the detection of organophosphorus pesticides
Source: Royal Society of Chemistry journal article supplement (doi:10.1039/c6ra13185a), 2016-01-01
Supplement: c6ra13185a1.pdf [file c6ra13185a1.pdf]

25 **Fig. S1** UV–visible spectra for as-synthesized AgNPs in colloidal solution.

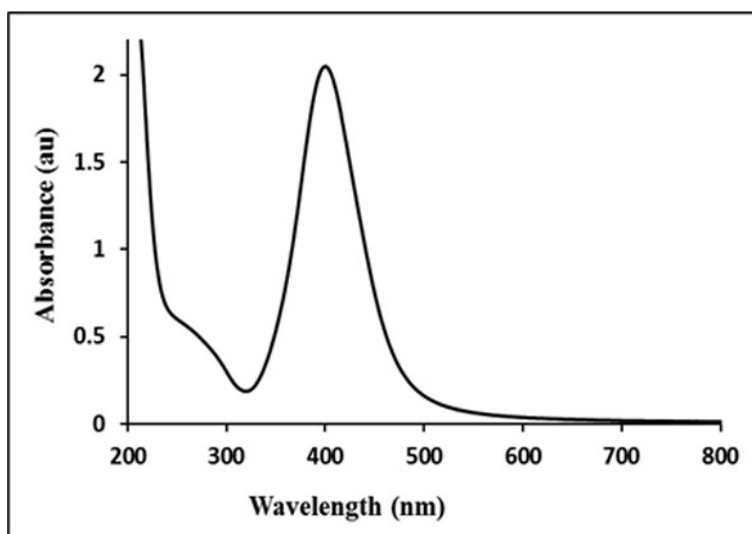

30 **Fig. S2** Absorbance spectra of glass supports in absence of AgNPs with (A) 10 % of APTES  
31 alone, (B) APTES 10 %, ATCh 1 mM, AChE 0.1 mU mL<sup>-1</sup>, and (C) in the presence of  
32 malathion 1 μM.

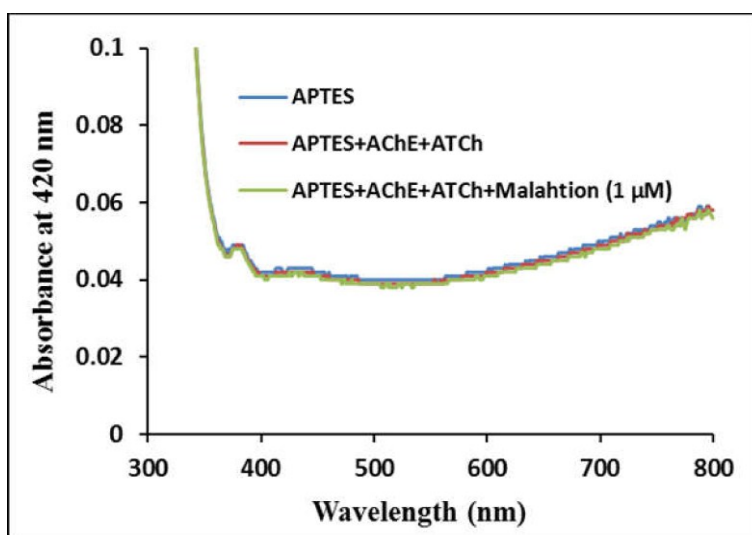

37 **Fig. S3** Absorbance spectra of AgNPs immobilized on glass surface with different time  
38 intervals.

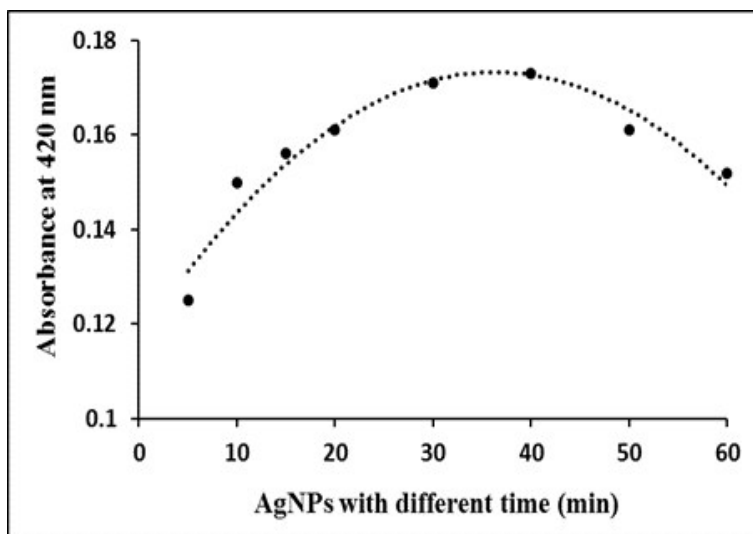

39

40

41

42

43 **Fig. S4** Absorbance spectra of AgNPs immobilized on glass surface in presence of  
44 preincubated ATCh (1 mM), AChE (0.1 mU mL<sup>-1</sup>), and malathion 1 μM with different time  
45 intervals.

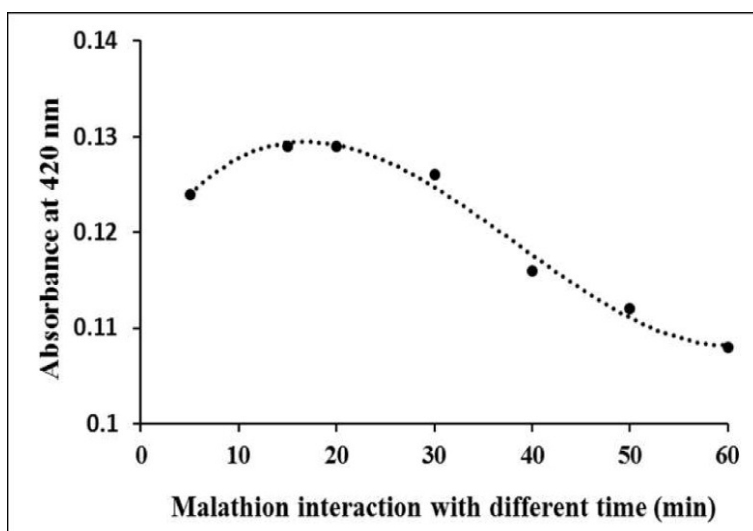

46

47

48 **Fig. S5** Photograph of (A) immobilization of enzyme (AChE and ATCh) on AgNPs (B)  
 49 immobilization of enzyme on AgNPs in presence of malathion (10 nM).

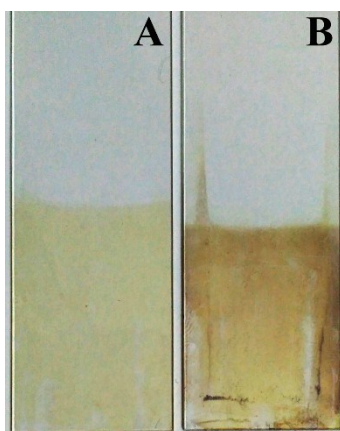

50

51

52

53 **Table S1.** Estimation of thiocholine production by acetylcholinesterase using Ellman's  
 54 method.

| Preincubation time for reaction mixture of both AChE (0.1 mU) and ATCh (1 mM) | Substrate hydrolyzed in suspension condition (mM) | Substrate hydrolyzed in Immobilized condition (mM) |
|-------------------------------------------------------------------------------|---------------------------------------------------|----------------------------------------------------|
| 0 min (before preincubation)                                                  | $0.094 \times 10^{-4}$                            | $0.105 \times 10^{-4}$                             |
| 20 min (preincubation time)                                                   | $0.116 \times 10^{-4}$                            | $0.296 \times 10^{-4}$                             |
| 30 min (after preincubation)                                                  | $0.162 \times 10^{-4}$                            | $0.335 \times 10^{-4}$                             |

55
